# Supplementary material
Source: PubMed Central journal article supplement (PMC1949353)
Supplement: mbc_E07-02-0166_1.pdf [file mbc_E07-02-0166_1.pdf]

Supplementary Information Online

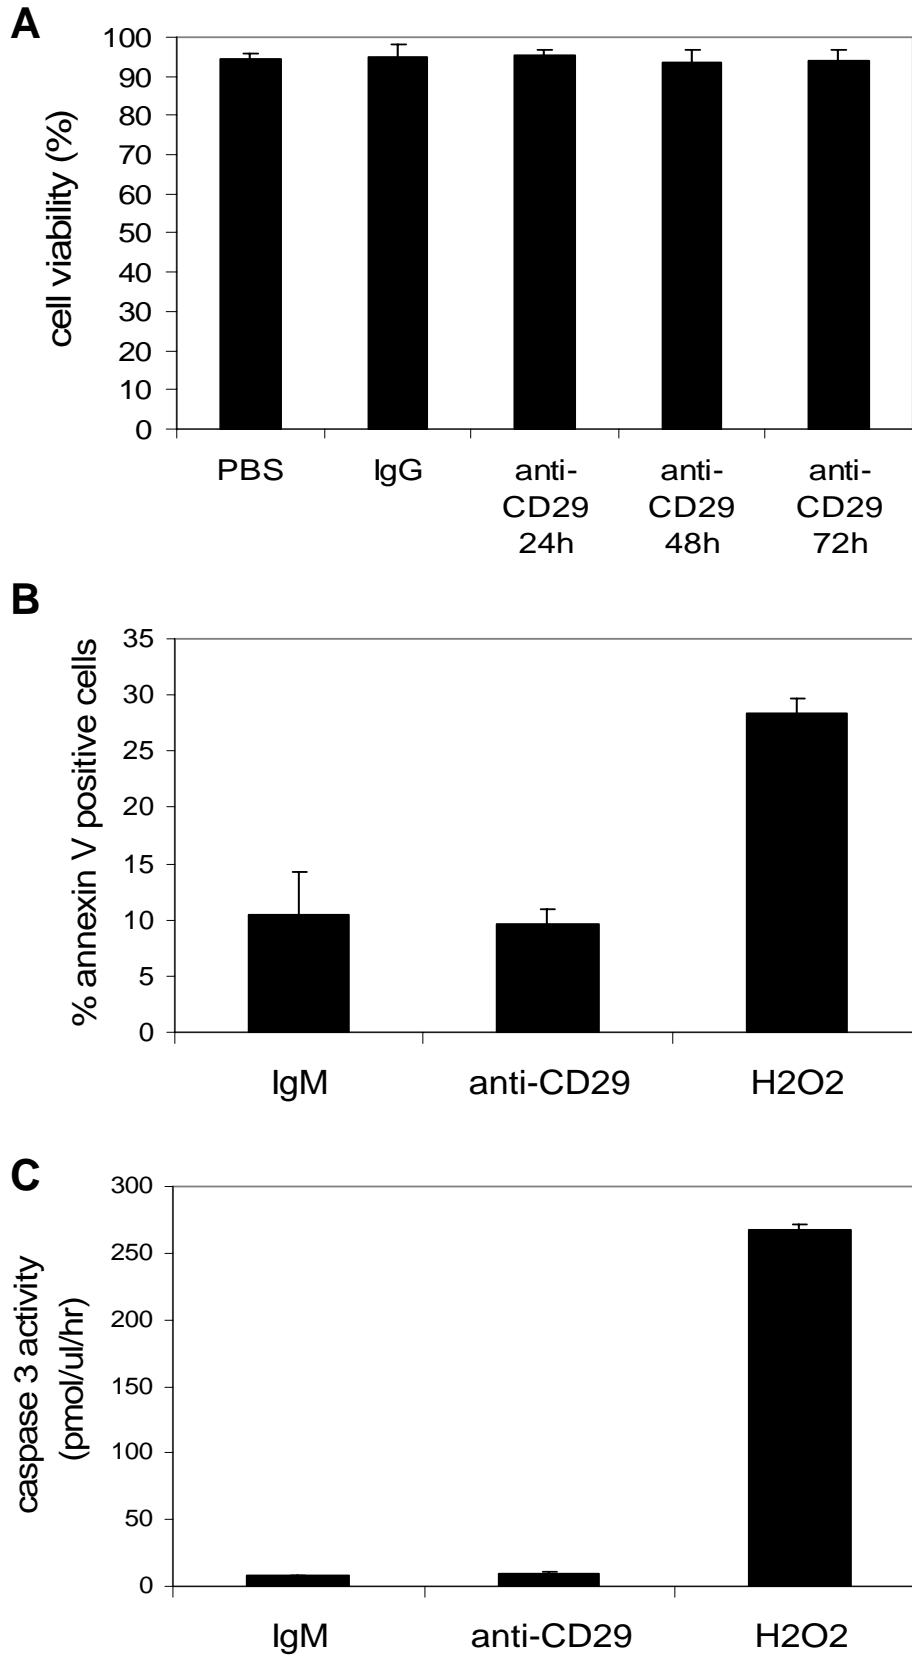

Figure 1

Figure 1. Apoptosis analysis. BM-MSCs were incubated with control IgM or anti-CD29 mAb at 40 ug/ml for 30 min on ice and then seeded in tissue culture plate in triplet wells and incubated for 24, 48 or 72 h. Cells were subjected to trypan blue viability analysis at all three time points (A) or annexin V apoptosis assay to detect the fractions of apoptotic cells on FACS (Annexin V Apoptosis Detection Kit, Santa Cruz) (B) and caspase 3 assay to measure the levels of caspase 3 on a flurometer (Caspase 3 Assay Kit, Sigma) (C) assays at 72 h. In B and C, MSCs treated with 0.5 mM H<sub>2</sub>O<sub>2</sub> for 3 h were used as positive controls. Each experiment was repeated three times. There is no statistical difference between IgM and anti-CD29 in all three analyses.
